# Supplementary material for: Quantifying and understanding carbon storage and sequestration within the Eastern Arc Mountains of Tanzania, a tropical biodiversity hotspot
Source: PubMed Central journal article supplement (PMC4041645; doi:10.1186/1750-0680-9-2), 2014-04-28

**(e) Historical logging**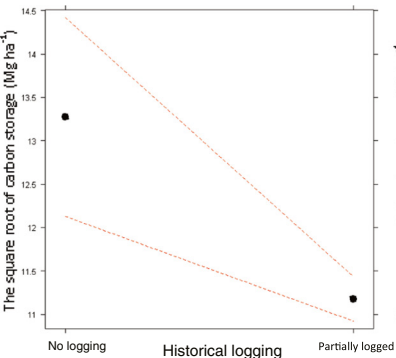**(d) Governance**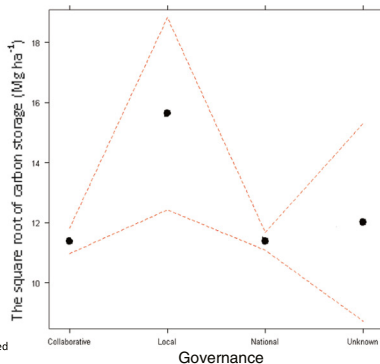**(c) Population pressure**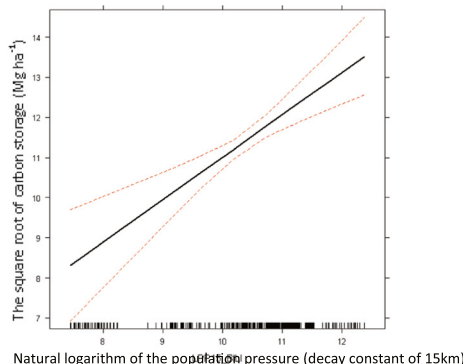**(b) Temperature range**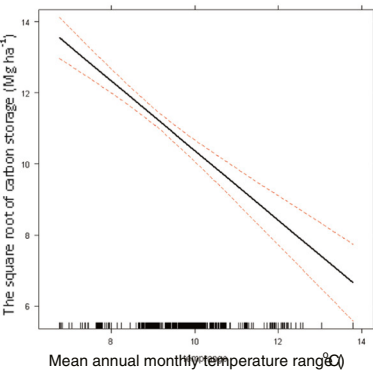**(a) Number of dry months**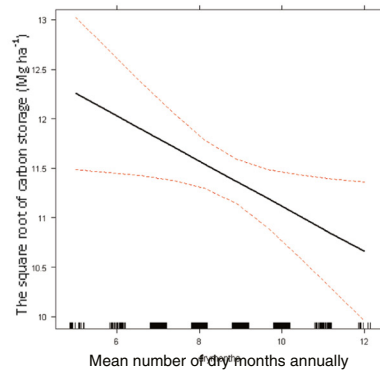**(f) Total available water capacity**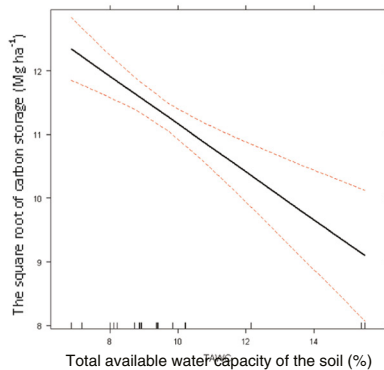

Supplement: 13021_2013_99_MOESM11_ESM.pdf [file 13021_2013_99_MOESM11_ESM.pdf]
